# Supplementary material for: Molecular and morphological identification of Biomphalaria species from the state of São Paulo, Brazil
Source: PubMed Central journal article supplement (PMC5534528; doi:10.3897/zookeys.668.10562), 2017-04-12
Supplement: zookeys-668-011-s001.pdf [file zookeys-668-011-s001.pdf]

ML Topology based on GTR+G+I model,  
with the highest logmaximum  
likelihood value (-2058.6343).

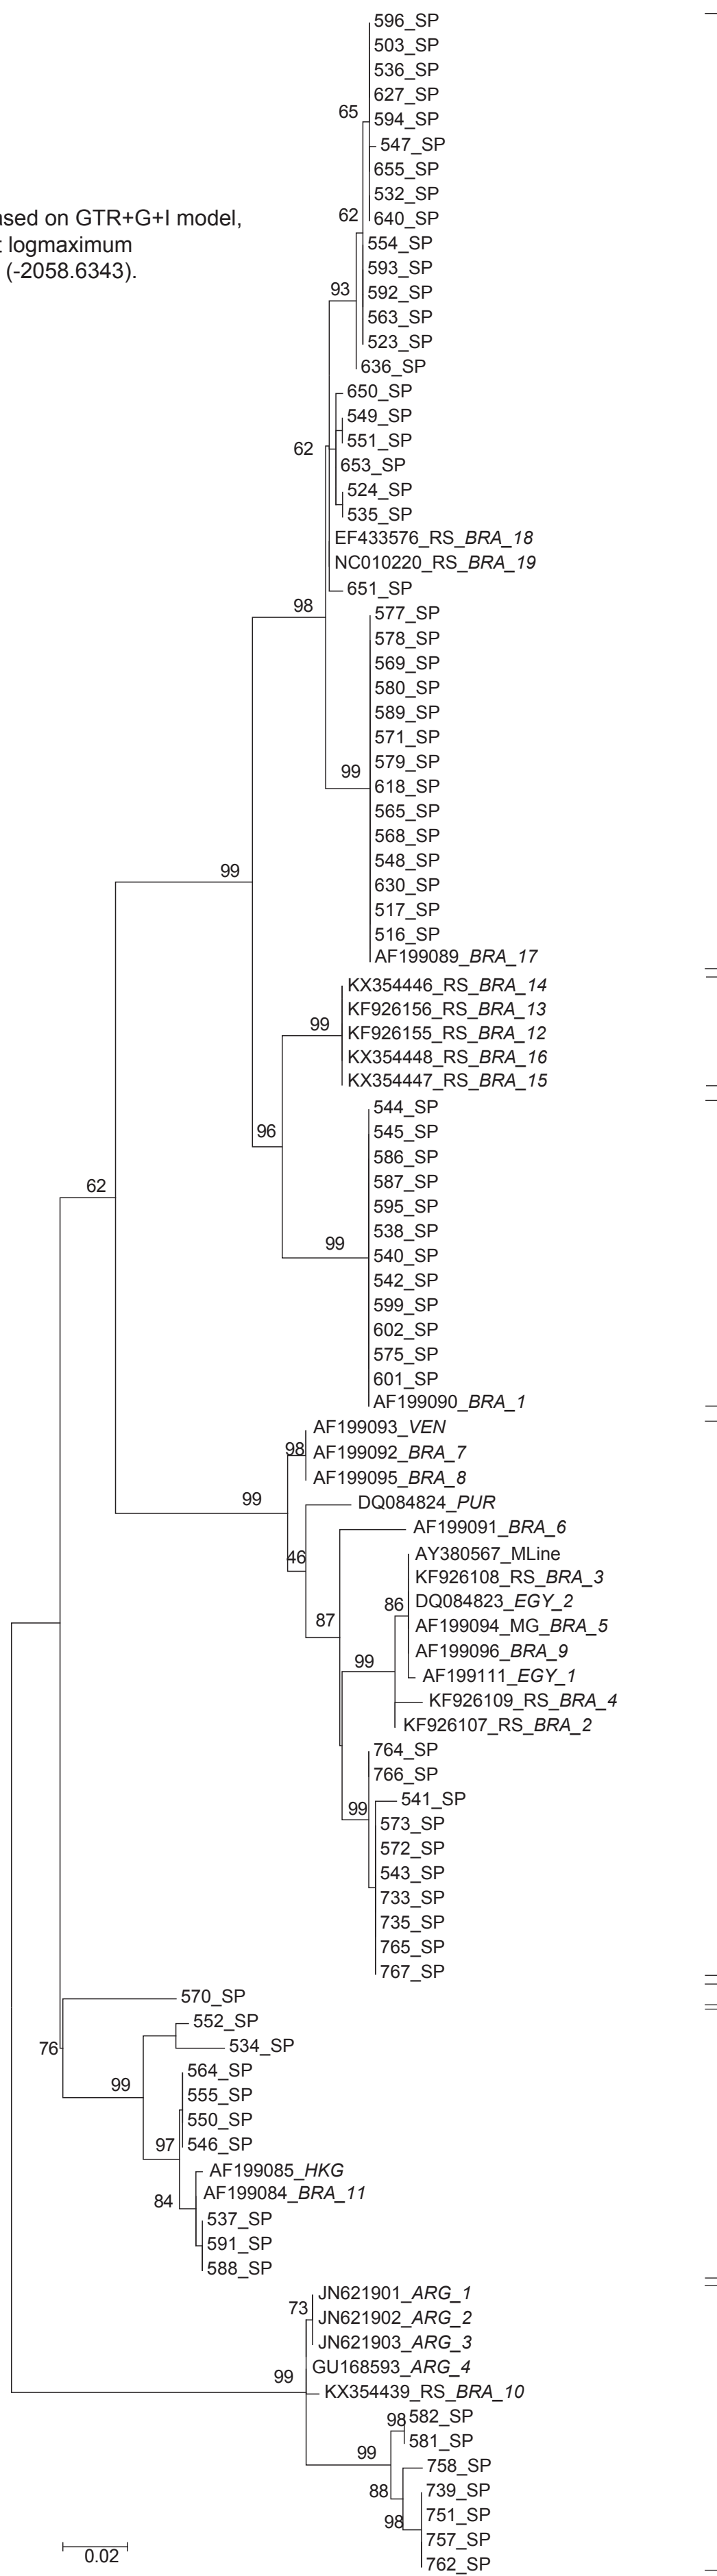

*B. tenagophila*

*B. t. guaibensis*

*B. occidentalis*

*B. glabrata*

*B. intermedia*

*B. straminea*

*B. peregrina*

0.02

NJ Tree based on  
Kimura 2P model.

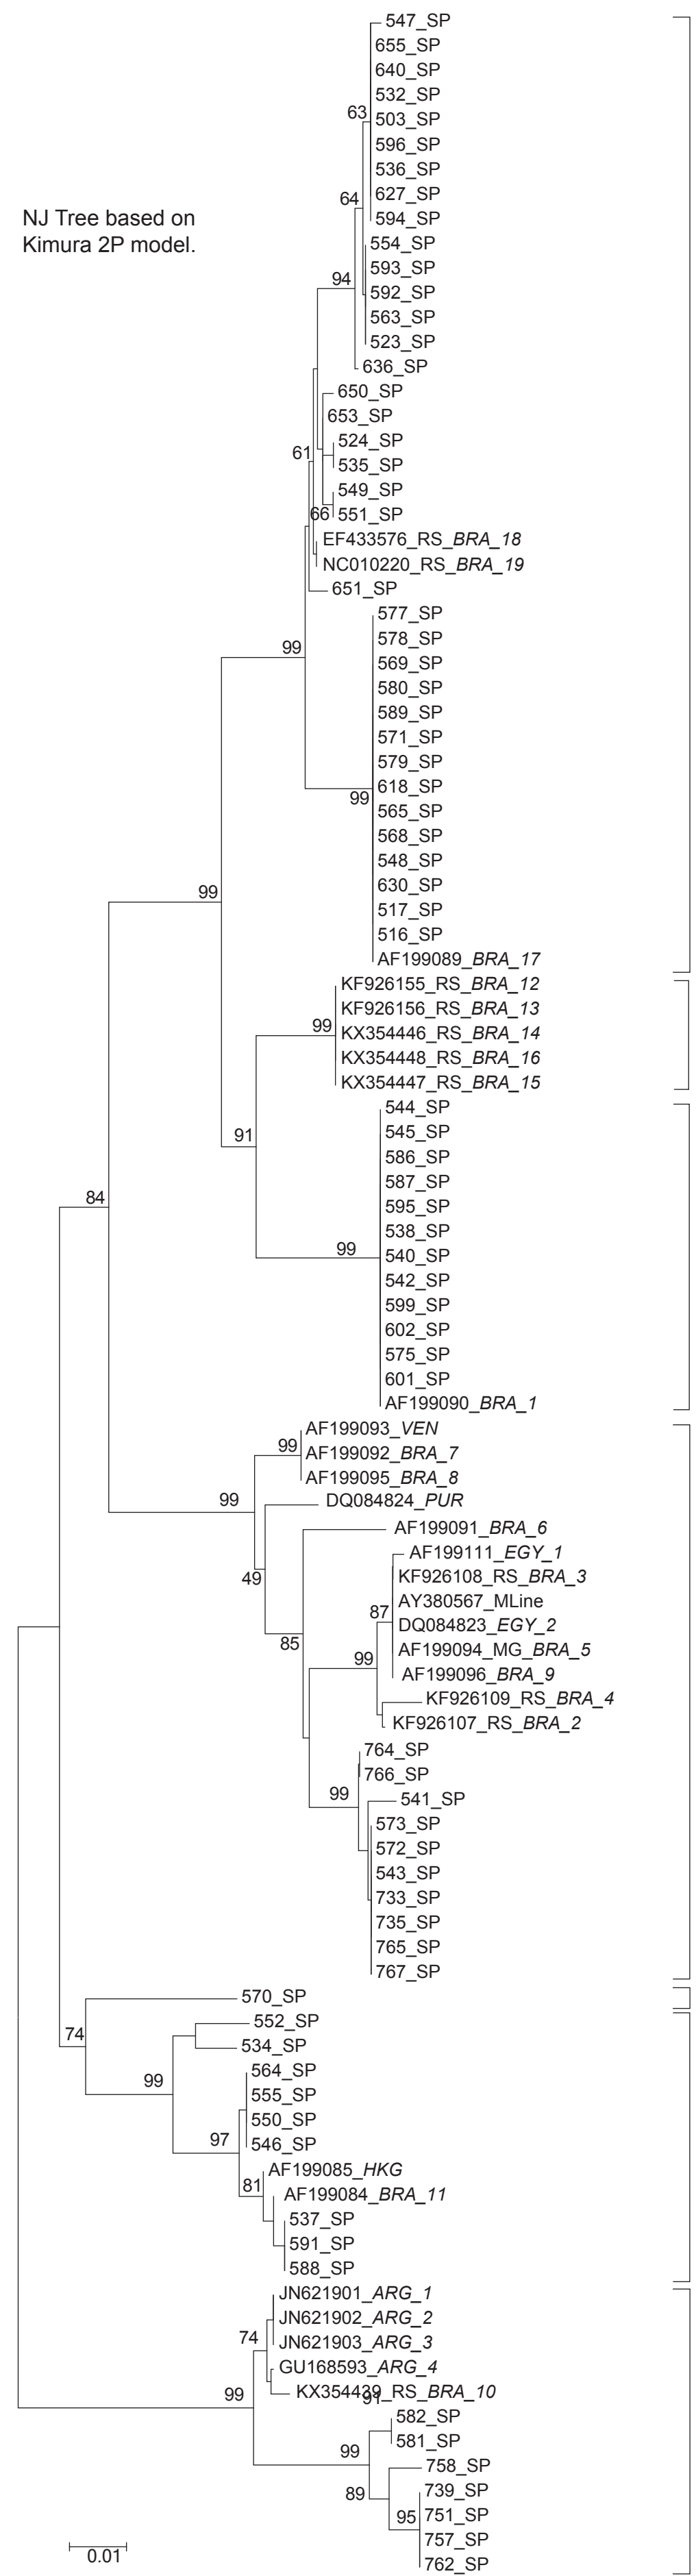

*B. tenagophila*

*B. t. guaibensis*

*B. occidentalis*

*B. glabrata*

*B. intermedia*

*B. straminea*

*B. peregrina*

0.01
